# Supplementary material for: Association between screening and the thyroid cancer “epidemic” in South Korea: evidence from a nationwide study
Source: PubMed Central journal article supplement — BMJ. 2016 Nov 30;355:i5745. doi: 10.1136/bmj.i5745 (PMC5130923; doi:10.1136/bmj.i5745), 2016-11-30
Supplement: pars028305.ww1_default.pdf [file pars028305.ww1_default.pdf]

## Appendix: Supplementary material

**Supplementary Figure 1.** Box plots showing the change in the tumour size by the diagnostic year according to the detection routes

Footnote: Y-axis represents tumour size (mm) in a 10 logarithmic scale. The box represent the 3<sup>rd</sup> quartile and 1<sup>st</sup> quartile of the tumour size and the median was shown inside the box. The lines, called whiskers, are drawn to span all data points within 1.5 interquartile range (IQR) from the upper and lower quartile and circles represent the extreme values beyond the bounds of the whisker.

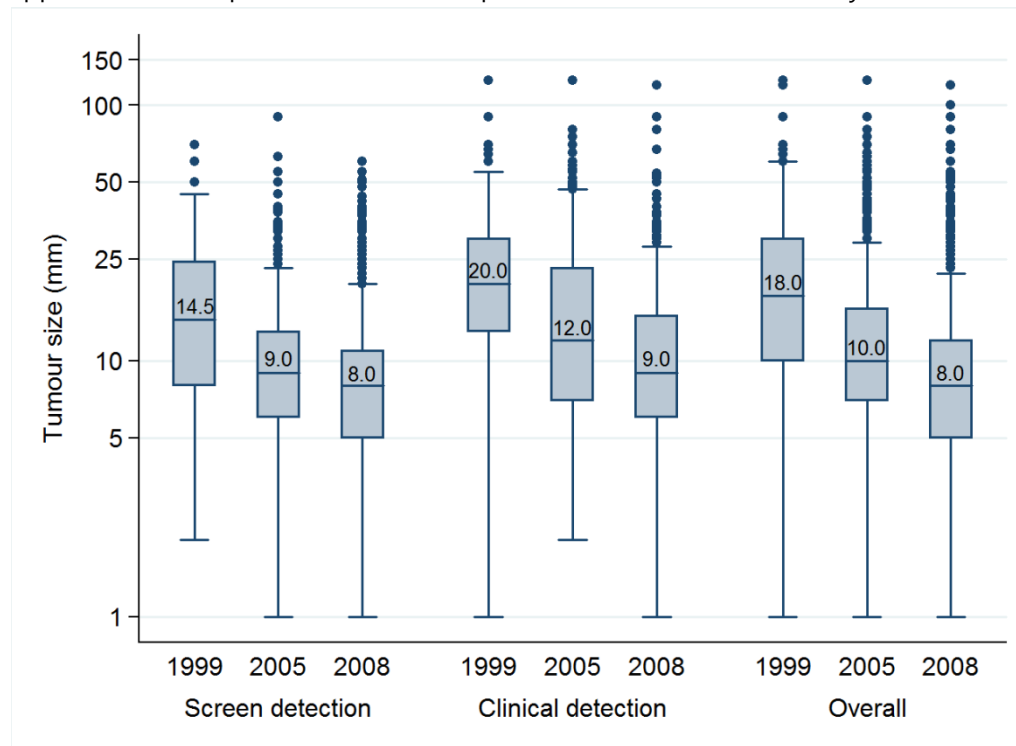

**Supplementary table 1. Comparison between estimated mean age and sex distribution of thyroid cancer patients and mean age and sex distribution of thyroid cancer patients**

|            | <b>Year</b>        |              |                    |               |                    |               |
|------------|--------------------|--------------|--------------------|---------------|--------------------|---------------|
|            | <b>1999</b>        |              | <b>2005</b>        |               | <b>2008</b>        |               |
|            | NEST data          | KNCI DB      | NEST data          | KNCI DB       | NEST data          | KNCI DB       |
| Age (year) | 46.3 (44.8 – 47.9) | 46.6 ± 15.2  | 47.3 (46.7 – 47.9) | 47.2 ± 12.8   | 47.0 (46.0 – 47.9) | 47.6 ± 12.1   |
| Sex        |                    |              |                    |               |                    |               |
| Men        | 136 (15.8)         | 521 (15.6)   | 328 (13.6)         | 1,779 (14.0)  | 434 (17.2)         | 4,336 (15.9)  |
| Women      | 755 (84.2)         | 2,823 (84.4) | 2,027 (86.4)       | 10,975 (86.1) | 2,116 (82.8)       | 22,905 (84.1) |

NEST data = National Epidemiologic Survey of Thyroid cancer; KNCI DB= Korea National Cancer Incidence Database

Mean ages and proportion of the sex from NEST data were estimated considering the weights and sample design.

Ages for NEST data were expressed as means and their 95% confidence intervals and ages for KNCI DB were expressed as means ± standard deviations.

Sexes for NEST data and KNCI DB were expressed as numbers (percentages).

**Supplementary table 2. Comparison between estimated age-standardized incidence rate of thyroid cancer and true age-standardized incidence rate of thyroid cancer**

|       | Year                                 |                               |                                      |                               |                                      |                               |
|-------|--------------------------------------|-------------------------------|--------------------------------------|-------------------------------|--------------------------------------|-------------------------------|
|       | 1999                                 |                               | 2005                                 |                               | 2008                                 |                               |
|       | Estimated incidence rate (NEST data) | Real incidence rate (KNCI DB) | Estimated incidence rate (NEST data) | Real incidence rate (KNCI DB) | Estimated incidence rate (NEST data) | Real incidence rate (KNCI DB) |
| Total | 6.37 (6.15 – 6.59)                   | 6.3                           | 20.45 (20.09 – 20.81)                | 20.7                          | 40.73 (40.23 – 41.22)                | 41.3                          |
| Men   | 2.18 (1.99 – 2.37)                   | 2.1                           | 5.68 (5.41 – 5.96)                   | 5.9                           | 13.97 (13.56 – 14.38)                | 13.3                          |
| Women | 10.48 (10.08 – 10.87)                | 10.4                          | 35.04 (34.38 – 35.71)                | 35.3                          | 67.61 (66.71 – 68.51)                | 69.3                          |

NEST data = National Epidemiologic Survey of Thyroid cancer; KNCI DB= Korea National Cancer Incidence Database

Age-standardized incidence rates and their 95% confidence intervals (CIs) was calculated per 100,000 people and Segi's world standard population was used for age-standardization. Age-standardized incidence rates were calculated as weighted mean of the age-specific rates, which the weights are taken from the proportion of population of Segi's world standard population.

Estimated incidence rates from NEST data were calculated considering the weights and sample design.

**Supplementary table 3. Changes in median tumour size of thyroid cancer according to the routes of tumour detection and, 1999-2008**

| Variables   | 1999                       |                  |     |               |       |                 | 2005                       |             |     |              |       |              | 2008                       |             |     |              |       |             |
|-------------|----------------------------|------------------|-----|---------------|-------|-----------------|----------------------------|-------------|-----|--------------|-------|--------------|----------------------------|-------------|-----|--------------|-------|-------------|
|             | Routes of tumour detection |                  |     |               |       |                 | Routes of tumour detection |             |     |              |       |              | Routes of tumour detection |             |     |              |       |             |
|             | SD                         |                  | CD  |               | Total |                 | SD                         |             | CD  |              | Total |              | SD                         |             | CD  |              | Total |             |
| Tumour size | n                          | Tumour size      | n   | Tumour size   | n     | Tumour size     | n                          | Tumour size | n   | Tumour size  | n     | Tumour size  | n                          | Tumour size | n   | Tumour size  | n     | Tumour size |
| Total       | 120                        | 14.5<br>(8-24.5) | 409 | 20<br>(13-30) | 891   | 18<br>(10-30)   | 1,090                      | 9<br>(6-13) | 773 | 12<br>(7-23) | 2,355 | 10<br>(7-16) | 1,431                      | 8<br>(5-11) | 564 | 9<br>(6-15)  | 2,550 | 8<br>(5-12) |
| Men         | 19                         | 15<br>(10-30)    | 66  | 25<br>(13-35) | 136   | 20.5<br>(12-35) | 163                        | 9<br>(7-15) | 87  | 20<br>(8-40) | 328   | 11<br>(7-21) | 257                        | 9<br>(6-13) | 81  | 10<br>(7-26) | 434   | 9<br>(6-15) |
| Women       | 115                        | 14<br>(8-20)     | 381 | 20<br>(13-30) | 755   | 18<br>(10-30)   | 927                        | 9<br>(6-13) | 686 | 12<br>(7-20) | 2,027 | 10<br>(7-15) | 1,174                      | 8<br>(5-11) | 483 | 8<br>(6-14)  | 2,116 | 8<br>(5-12) |

SD=Screen detection; CD=Clinical detection; LN=Lymph node involvement

Total include cases detected by screen detection, clinical detection and unknown routes of detection

Tumour sizes were expressed as median (interquartile range)

**Supplementary table 4. proportion of regional lymph node involvement by tumour size according to the routes of tumour detection and, 1999-2008**

| Variables   | 1999                       |              |     |              |       |              | 2005                       |               |     |              |       |               | 2008                       |               |     |              |       |               |
|-------------|----------------------------|--------------|-----|--------------|-------|--------------|----------------------------|---------------|-----|--------------|-------|---------------|----------------------------|---------------|-----|--------------|-------|---------------|
|             | Routes of tumour detection |              |     |              |       |              | Routes of tumour detection |               |     |              |       |               | Routes of tumour detection |               |     |              |       |               |
|             | SD                         |              | CD  |              | Total |              | SD                         |               | CD  |              | Total |               | SD                         |               | CD  |              | Total |               |
| Tumour size | n                          | LN(+)        | n   | LN(+)        | n     | LN(+)        | n                          | LN(+)         | n   | LN(+)        | n     | LN(+)         | n                          | LN(+)         | n   | LN(+)        | n     | LN(+)         |
| <10mm       | 33                         | 6<br>(18.2)  | 59  | 12<br>(20.3) | 162   | 37<br>(22.8) | 558                        | 120<br>(21.5) | 255 | 68<br>(26.7) | 1,013 | 245<br>(24.2) | 906                        | 262<br>(28.9) | 294 | 56<br>(19.1) | 1,512 | 430<br>(28.4) |
| 10- 20mm    | 43                         | 16<br>(37.2) | 112 | 33<br>(29.5) | 232   | 79<br>(34.1) | 392                        | 168<br>(42.9) | 250 | 95<br>(38.0) | 768   | 310<br>(40.4) | 421                        | 208<br>(49.4) | 159 | 68<br>(42.8) | 707   | 345<br>(48.8) |
| 20-30mm     | 21                         | 10<br>(47.6) | 100 | 45<br>(45.0) | 168   | 82<br>(48.8) | 73                         | 36<br>(49.3)  | 112 | 60<br>(53.6) | 234   | 125<br>(53.4) | 57                         | 30<br>(52.6)  | 48  | 28<br>(58.3) | 138   | 81<br>(58.7)  |
| ≥30mm       | 23                         | 8<br>(34.8)  | 138 | 60<br>(43.5) | 208   | 92<br>(44.2) | 43                         | 22<br>(51.2)  | 128 | 63<br>(49.2) | 212   | 109<br>(51.4) | 32                         | 12<br>(37.5)  | 50  | 29<br>(58.0) | 115   | 65<br>(56.5)  |
| Unspecified | 14                         | 6<br>(42.9)  | 38  | 10<br>(26.3) | 121   | 29<br>(24.0) | 24                         | 3<br>(12.5)   | 28  | 3<br>(10.7)  | 128   | 10<br>(7.8)   | 15                         | 2<br>(13.3)   | 13  | 2<br>(15.4)  | 78    | 8<br>(10.3)   |

SD=Screen detection; CD=Clinical detection; LN=Lymph node involvement

Total include cases detected by screen detection, clinical detection and unknown routes of detection

Lymph node involvements were expressed as numbers (percentages)
